# Supplementary material for: The rational design of hierarchical MoS2 nanosheet hollow spheres sandwiched between carbon and TiO2@graphite as an improved anode for lithium-ion batteries
Source: Royal Society of Chemistry journal article supplement (doi:10.1039/c9na00019d), 2019-01-01
Supplement: c9na00019d1.pdf [file c9na00019d1.pdf]

## Supporting Information

### **Rational design of hierarchical MoS<sub>2</sub> nanosheets hollow sphere sandwiched between carbon and TiO<sub>2</sub>@graphite as improved anode for lithium-ion batteries**

Faze Wang,<sup>a, b, c</sup> Fanggang Li,<sup>a</sup> Maojun Zheng,<sup>\*a</sup> Yanbo Li,<sup>\*b</sup> and Li Ma<sup>d</sup>

<sup>a</sup> *Key Laboratory of Artificial Structure and Quantum Control, Ministry of Education, Department of Physics and Astronomy, Shanghai Jiao Tong University, Shanghai, 200240, China.*

<sup>b</sup> *Institute of Fundamental and Frontier Sciences, University of Electronic Science and Technology of China, Chengdu, 610054, China.*

<sup>c</sup> *Walter Schottky Institut and Physik Department, Technische Universität München, Garching 85748, Germany.*

<sup>d</sup> *School of Chemistry and Chemical Technology, Shanghai Jiao Tong University, Shanghai, 200240, China.*

*\* Corresponding Author:*

*E-mail: mjzheng@sjtu.edu.cn (M. Zheng); E-mail: yanboli@uestc.edu.cn (Y. Li)*

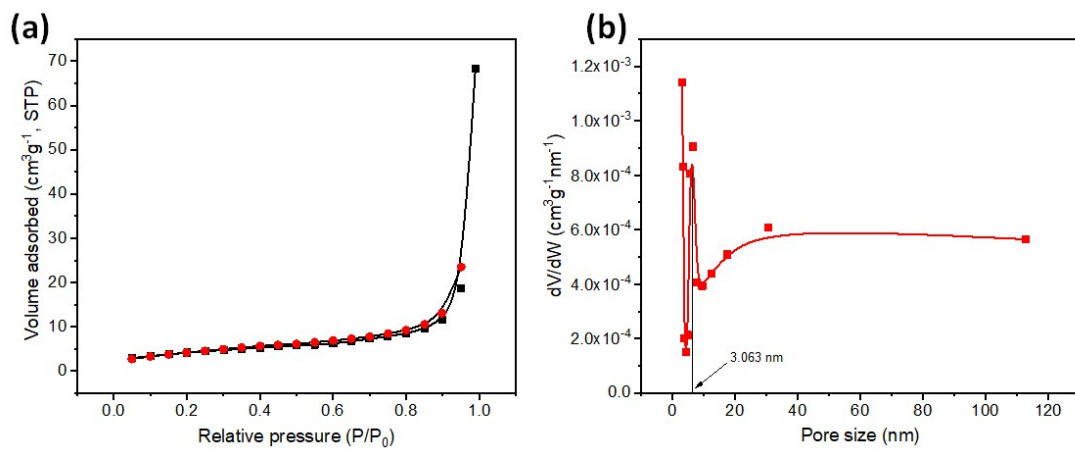

**Figure 1.** (a)  $N_2$  adsorption and desorption isotherms and (b) The pore size distribution of  $TiO_2@G@MoS_2@C$  hollow spheres

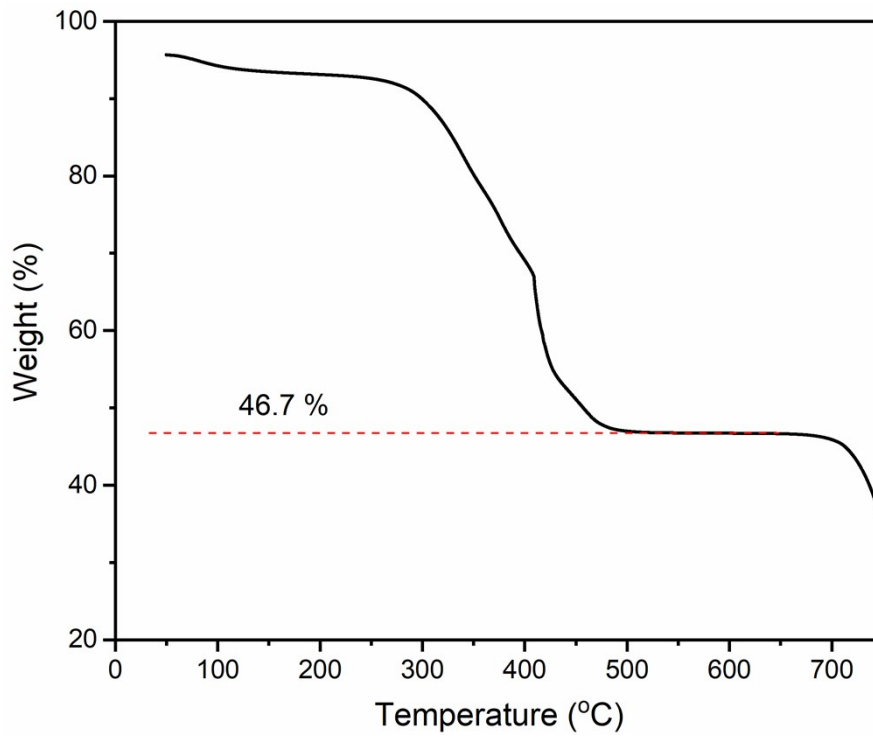

**Figure 2.** TGA curve of TiO<sub>2</sub>@G@MoS<sub>2</sub>@C.

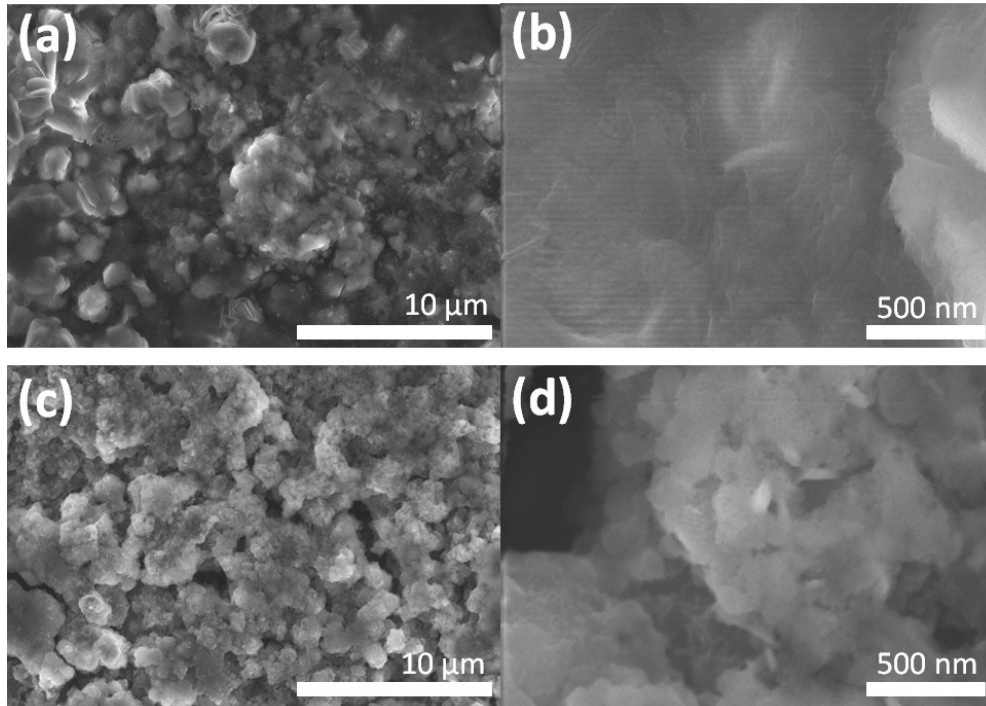

**Figure 3.** (a, b) SEM images of  $\text{TiO}_2@\text{G}@\text{MoS}_2$  hollow spheres electrode after 50 cycles. (c, d) SEM images of  $\text{TiO}_2@\text{G}@\text{MoS}_2@\text{C}$  hollow sphere electrode after 100 cycles.

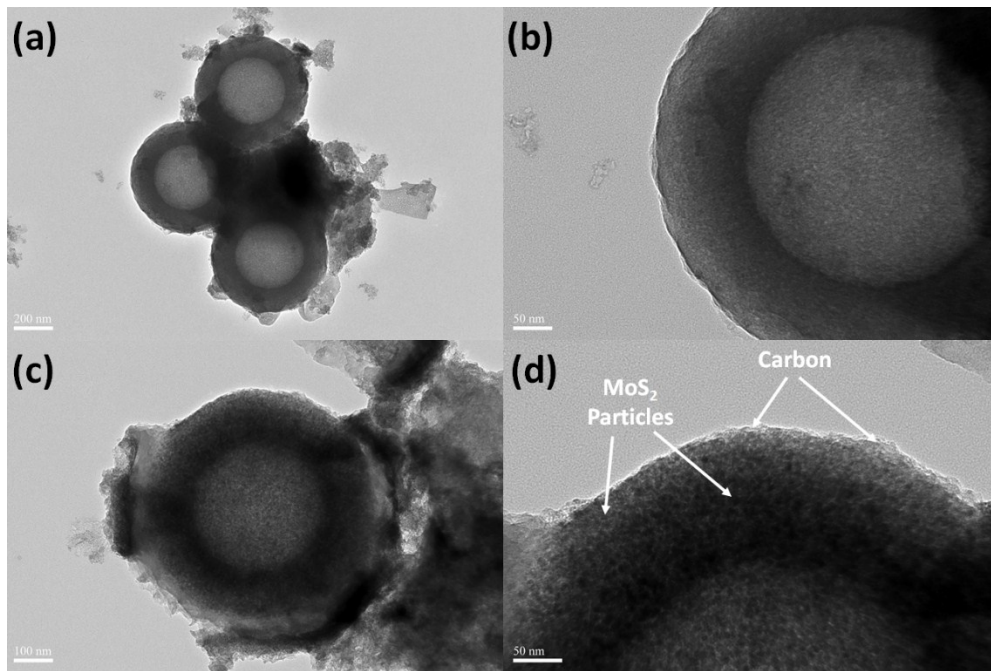

**Figure 4.** (a) TEM images of TiO<sub>2</sub>@G@MoS<sub>2</sub> hollow spheres electrode after 50 cycles. (b) TEM images of TiO<sub>2</sub>@G@MoS<sub>2</sub>@C hollow sphere electrode after 100 cycles. (c) and (d) are higher magnification views of the spheres.
